# Supplementary material for: Intra-articular Administration of Triamcinolone Acetonide in a Murine Cartilage Defect Model Reduces Inflammation but Inhibits Endogenous Cartilage Repair
Source: PubMed Central journal article supplement — Am J Sports Med. 2022 Mar 22;50(6):1668–78. doi: 10.1177/03635465221083693 (PMC9069659; doi:10.1177/03635465221083693), 2022-03-22
Supplement: sj-pdf-1-ajs-10.1177_03635465221083693.pdf [file sj-pdf-1-ajs-10.1177_03635465221083693.pdf]

# Intra-articular administration of triamcinolone acetonide in a murine cartilage defect model reduces inflammation but inhibits endogenous cartilage repair

## Appendix

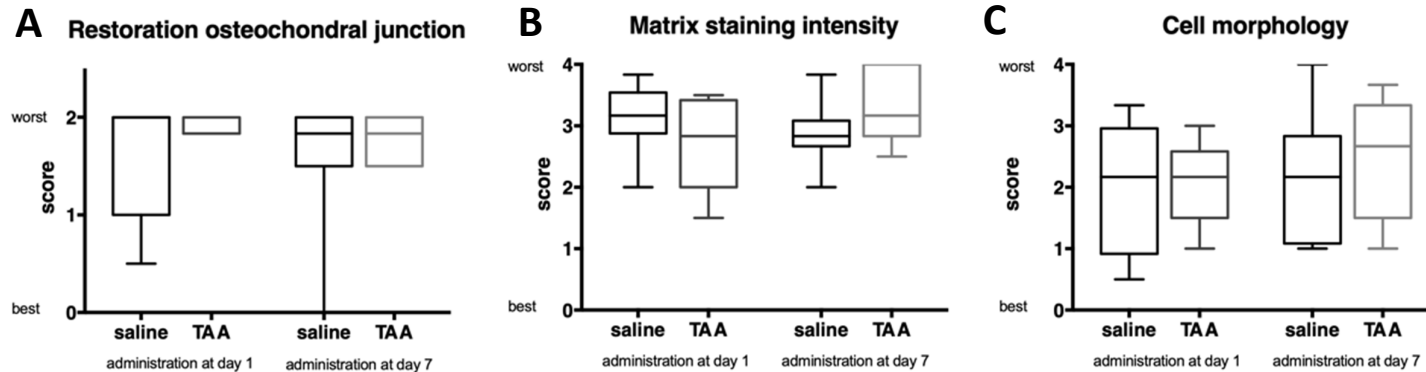

**Figure A1. Triamcinolone acetonide did not affect the subdomains of the cartilage repair score.**

A) Restoration of the original osteochondral junction at day 28 scored on a scale of 0 (restored) to 2 (not restored). B) Matrix staining intensity of thionine scored on a scale of 0 (normal) to 4 (no staining). C) Cell morphology scored on a scale of 0 (normal) to 4 (non-chondrocytic cells). Box plots represent the 25<sup>th</sup> and 75<sup>th</sup> percentile with the median, the whiskers indicate the maximum and minimum. n=5-10 mice per group. Abbreviations: TAA, triamcinolone acetonide.
